# Supplementary material
Source: PubMed Central journal article supplement (PMC9494269)
Supplement: jamadermatol-e223112-s001.pdf [file jamadermatol-e223112-s001.pdf]

## Supplementary Online Content

Bolender CM, Jimenez A, Clarke JT, Willson TM, Stevens VW, Rhoads JLW.  
Incidence of dermatomyositis in a nationwide cohort study of US veterans. *JAMA Dermatol*. Published online September 21, 2022.  
doi:10.1001/jamadermatol.2022.3112

### **eFigure.** VA Incident Dermatomyositis Cohort Attrition

This supplementary material has been provided by the authors to give readers additional information about their work.

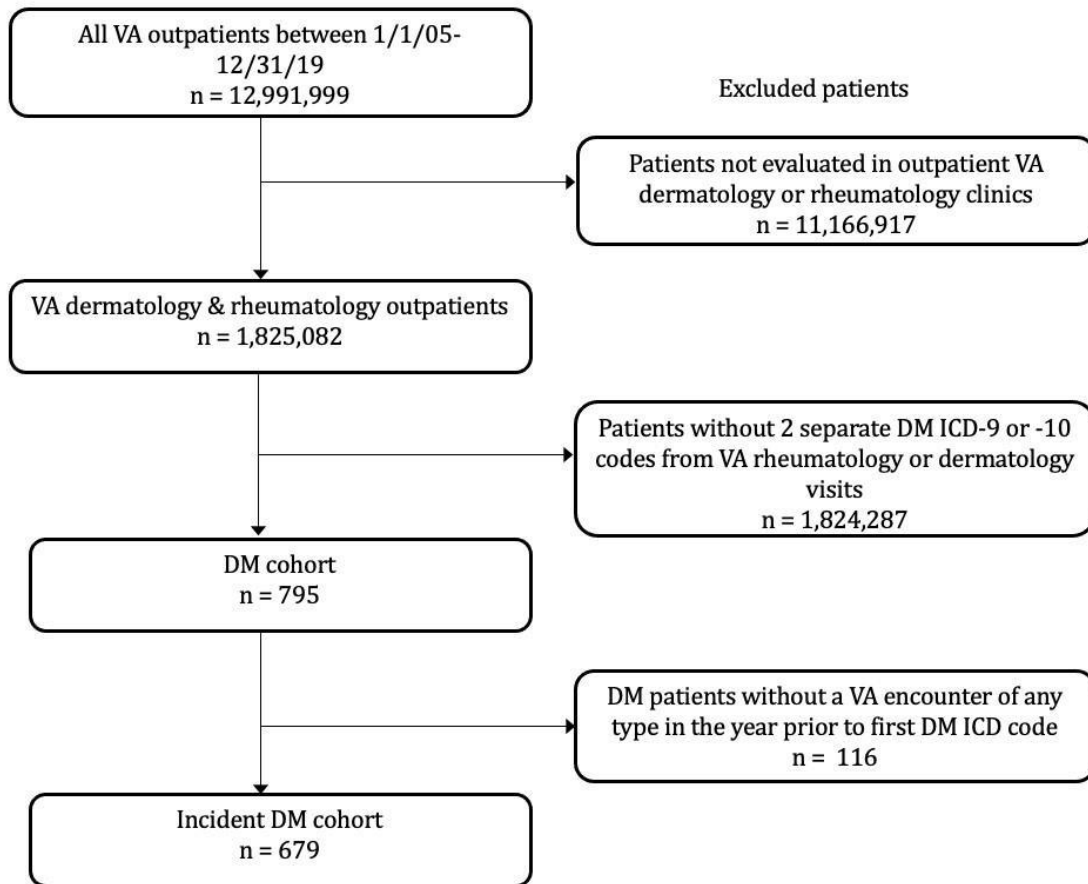

**eFigure.** VA Incident Dermatomyositis Cohort Attrition
